# Supplementary material for: Professional roles and relationships during the COVID-19 pandemic: a qualitative study among US clinicians
Source: PubMed Central journal article supplement — BMJ Open. 2021 Mar 25;11(3):e047782. doi: 10.1136/bmjopen-2020-047782 (PMC7995668; doi:10.1136/bmjopen-2020-047782), 2021-03-25
Supplement: bmjopen-2020-047782supp001.pdf [file bmjopen-2020-047782supp001.pdf]

**Supplementary Table 1:** Sample semi-structured interview guide

| Questions*                                                                                                                                                                                     | Prompt                                                                                                                                                                |
|------------------------------------------------------------------------------------------------------------------------------------------------------------------------------------------------|-----------------------------------------------------------------------------------------------------------------------------------------------------------------------|
| First, can you tell me a little about yourself and your clinical role?                                                                                                                         |                                                                                                                                                                       |
| What has it been like for you taking care of patients during the COVID-19 pandemic?                                                                                                            | Can you give me some examples of situations that have been particularly challenging? Any situations that have gone well?<br>In what ways have your practices changed? |
| How has the pandemic shaped your clinical practices and how you care for patients?                                                                                                             | What was most difficult for you? What worked well?<br>Can you give me some specific examples?                                                                         |
| Have you encountered any situations in which medical resources were limited or you had difficulty getting patients the treatments they needed during the pandemic? What was that like for you? | Can you give me some examples?                                                                                                                                        |
| Have you talked to patients or family about how their care might be different during the pandemic? What has that been like?                                                                    | Can you give me some examples?<br>What was that like for you?                                                                                                         |
| Have you helped to develop new institutional policies during the pandemic? What has this been like?                                                                                            | Can you give me some examples?<br>What has been difficult? What has worked well?                                                                                      |
| Is there anything else that we have not covered that you would like to bring up?                                                                                                               |                                                                                                                                                                       |

\*The interview guide was adapted throughout the study in response to emerging concepts and in order to promote thematic saturation.
