# Supplementary material for: Professional roles and relationships during the COVID-19 pandemic: a qualitative study among US clinicians
Source: PubMed Central journal article supplement — BMJ Open. 2021 Mar 25;11(3):e047782. doi: 10.1136/bmjopen-2020-047782 (PMC7995668; doi:10.1136/bmjopen-2020-047782), 2021-03-25
Supplement: bmjopen-2020-047782supp002.pdf [file bmjopen-2020-047782supp002.pdf]

**Supplementary Table 2.** Consolidated Criteria for Reporting Qualitative Research Guidelines

(COREQ) checklist

| Item                                           | Guide questions/description                                                                                                                              | Location in manuscript                                                                                                                       |
|------------------------------------------------|----------------------------------------------------------------------------------------------------------------------------------------------------------|----------------------------------------------------------------------------------------------------------------------------------------------|
| <b>Domain 1: Research team and reflexivity</b> |                                                                                                                                                          |                                                                                                                                              |
| <i>Personal Characteristics</i>                |                                                                                                                                                          |                                                                                                                                              |
| 1. Interviewer/facilitator                     | Which author/s conducted the interview or focus group?                                                                                                   | Methods, Paragraph 2                                                                                                                         |
| 2. Credentials                                 | What were the researcher's credentials? E.g. PhD, MD                                                                                                     | Author list                                                                                                                                  |
| 3. Occupation                                  | What was their occupation at the time of the study?                                                                                                      | Methods, Paragraph 2                                                                                                                         |
| 4. Gender                                      | Was the researcher male or female?                                                                                                                       | Methods, Paragraph 2                                                                                                                         |
| 5. Experience and training                     | What experience or training did the researcher have?                                                                                                     | Methods, Paragraph 2                                                                                                                         |
| <i>Relationship with participants</i>          |                                                                                                                                                          |                                                                                                                                              |
| 6. Relationship established                    | Was a relationship established prior to study commencement?                                                                                              | Methods, paragraph 1                                                                                                                         |
| 7. Participant knowledge of the interviewer    | What did the participants know about the researcher? e.g. personal goals, reasons for doing the research                                                 | The intention of the research (to better understand clinician experience during the pandemic) was included in written information materials. |
| 8. Interviewer characteristics                 | What characteristics were reported about the interviewer/facilitator? e.g. Bias, assumptions, reasons and interests in the research topic                | Methods, paragraph 2                                                                                                                         |
| <b>Domain 2: Study design</b>                  |                                                                                                                                                          |                                                                                                                                              |
| <i>Theoretical framework</i>                   |                                                                                                                                                          |                                                                                                                                              |
| 9. Methodological orientation and Theory       | What methodological orientation was stated to underpin the study? e.g. grounded theory, discourse analysis, ethnography, phenomenology, content analysis | Methods, paragraph 3.                                                                                                                        |
| <i>Participant selection</i>                   |                                                                                                                                                          |                                                                                                                                              |
| 10. Sampling                                   | How were participants selected? e.g. purposive, convenience, consecutive, snowball                                                                       | Methods, paragraph 1                                                                                                                         |
| 11. Method of approach                         | How were participants approached? e.g. face-to-face, telephone, mail, email                                                                              | Methods, paragraph 1                                                                                                                         |
| 12. Sample size                                | How many participants were in the study?                                                                                                                 | Results, paragraph 1                                                                                                                         |
| 13. Non-participation                          | How many people refused to participate or dropped out? Reasons?                                                                                          | Results, paragraph 1                                                                                                                         |
| <i>Setting</i>                                 |                                                                                                                                                          |                                                                                                                                              |
| 14. Setting of data collection                 | Where was the data collected? e.g. home, clinic, workplace                                                                                               | Methods, paragraph 2                                                                                                                         |
| 15. Presence of non-participants               | Was anyone else present besides the participants and researchers?                                                                                        | No.                                                                                                                                          |

|                                        |                                                                                                                                 |                      |
|----------------------------------------|---------------------------------------------------------------------------------------------------------------------------------|----------------------|
| 16. Description of sample              | What are the important characteristics of the sample? e.g. demographic data, date                                               | Results, paragraph 1 |
| <i>Data collection</i>                 |                                                                                                                                 |                      |
| 17. Interview guide                    | Were questions, prompts, guides provided by the authors? Was it pilot tested?                                                   | Appendix, Table 1    |
| 18. Repeat interviews                  | Were repeat interviews carried out? If yes, how many?                                                                           | Methods, paragraph 2 |
| 19. Audio/visual recording             | Did the research use audio or visual recording to collect the data?                                                             | Methods, paragraph 1 |
| 20. Field notes                        | Were field notes made during and/or after the interview or focus group?                                                         | Yes.                 |
| 21. Duration                           | What was the duration of the interviews or focus group?                                                                         | Methods, paragraph 1 |
| 22. Data saturation                    | Was data saturation discussed?                                                                                                  | Methods, paragraph 3 |
| 23. Transcripts returned               | Were transcripts returned to participants for comment and/or correction?                                                        | Methods, paragraph 2 |
| <b>Domain 3: Analysis and findings</b> |                                                                                                                                 |                      |
| <i>Data analysis</i>                   |                                                                                                                                 |                      |
| 24. Number of data coders              | How many data coders coded the data?                                                                                            | Methods, paragraph 3 |
| 25. Description of the coding tree     | Did authors provide a description of the coding tree?                                                                           | Method not used      |
| 26. Derivation of themes               | Were themes identified in advance or derived from the data?                                                                     | Methods, paragraph 3 |
| 27. Software                           | What software, if applicable, was used to manage the data?                                                                      | Methods, paragraph 3 |
| 28. Participant checking               | Did participants provide feedback on the findings?                                                                              | Method not used      |
| <i>Reporting</i>                       |                                                                                                                                 |                      |
| 29. Quotations presented               | Were participant quotations presented to illustrate the themes/findings? Was each quotation identified? e.g. participant number | Table 2-4            |
| 30. Data and findings consistent       | Was there consistency between the data presented and the findings?                                                              | Results, Tables 2-4  |
| 31. Clarity of major themes            | Were major themes clearly presented in the findings?                                                                            | Results, Paragraph 1 |
| 32. Clarity of minor themes            | Is there a description of diverse cases or discussion of minor themes?                                                          | Results, throughout  |

Based on Tong A, Sainsbury P, Craig J. Consolidated criteria for reporting qualitative research (COREQ): a 32-item checklist for interviews and focus groups. *Int J Qual Health Care*. 2007;19(6):349-357
